# Supplementary material for: BORC-ARL8-HOPS ensemble is required for lysosomal cholesterol egress through NPC2
Source: PubMed Central journal article supplement — Mol Biol Cell. 2022 Jul 21;33(9):ar81. doi: 10.1091/mbc.E21-11-0595-T (PMC9582633; doi:10.1091/mbc.e21-11-0595-t), 2022-07-21

# Supplementary Materials

*Molecular Biology of the Cell*

Anderson *et al.*

## Supplemental Information

### Supplemental figure legends

#### **Fig. S1. BORC subunits MEF2BNB and KXD1 are critically required for BORC function.**

**A.** Cell lysates were extracted from the indicated cells and subjected to immunoblotting with antibodies against BORC unique subunits myrlysin, diaskedin, and lyspersin, and the BORC-BLOC1-shared subunit snapin. PDI serves as a loading control. Quantification of the indicated proteins was from 3 independent experiments and was normalized to WT. **B.** The indicated cells were transfected with the plasmids encoding ARL8b-GFP, fixed at 24 h post transfection, immunostained with the antibodies against GFP and LAMP1, and imaged with confocal microscope. *p* values were determined using *Student's t* test. \*, *p*<0.05, \*\*, *p*<0.01, and no labeling means there was no significant difference (vs. WT). Scale bars, 5  $\mu$ m.

#### **Fig. S2. Confirmation of CRISPR-Cas9 gene knock out (KO) by immunoblotting.**

Cell lysates were extracted from the indicated cells and subjected to immunoblotting with antibodies against ARL8a and ARL8b (**A**) or VPS39 and VPS41 (**B**). GAPDH serves as a loading control.

#### **Fig. S3. NPC2 and cathepsin D were less associated with lysosomes in living cells with HOPS deletion.**

The indicated cells were transfected with the plasmids encoding NPC2-mCherry (n=43 and 23 in the upper panel, and n=48, 45, and 21 in the lower panel) (**A**) or cathepsin D-RFP (n=31 and 43) (**B**) and stained with LysoTracker (1:10,000, ThermoFisher) in complete medium for 30 min. Cells were imaged with a confocal microscope and analyzed for NPC2/cathepsin D-LysoTracker colocalization. *p* values were determined using *Student's t* test. \*\*\*, *p*<0.001 (vs. WT). Scale bars, 5  $\mu$ m. **C.** NPC2- and cathepsin D-positive lysosomes (labeled with LysoTracker) were quantified based on the images obtained from (**A**) and (**B**), and the percentages of NPC2- or cathepsin D-positive

lysosomes out of the total lysosomes are shown in the graph. *p* values were determined using *Student's t* test. \*\*\*\*, *p*<0.0001.

**Fig. S4. Disruption of BORC/ARL8/HOPS did not change CD-MPR levels.**

Cell lysates were extracted from the indicated cells and subjected to immunoblotting with the antibody against CD-MPR. Calnexin serves as a loading control. Quantification was from 3 independent experiments and normalized to WT cells. *p* values were determined using *Student's t* test. n.s., no significant difference (vs. WT).

**Supplemental tables**

**Table. S1 cDNA constructs used in this study**

| Insert                          | Vector                     | Tag              | Remarks                                             |
|---------------------------------|----------------------------|------------------|-----------------------------------------------------|
| Target sequences of human ARL8a | pSpCas9(BB)-2A-GFP (PX458) | 3X N-FLAG, c-GFP |                                                     |
| Target sequences of human ARL8b | pSpCas9(BB)-2A-GFP (PX458) | 3X N-FLAG, c-GFP |                                                     |
| Target sequences of human VPS39 | pSpCas9(BB)-2A-GFP (PX458) | 3X N-FLAG, c-GFP |                                                     |
| Target sequences of human VPS41 | pSpCas9(BB)-2A-GFP (PX458) | 3X N-FLAG, c-GFP |                                                     |
| ARL8b-GFP                       | pcDNA3.1/CT-GFP            | C-GFP            | Gift from Dr. J. H. Brumell (University of Toronto) |
| NPC2                            | mcherry-N1                 | c-mCherry        | Gift from Dr. P. Lobel (Rutgers University)         |
| NPC1                            | N3                         | EGFP and His6    | Addgene #53521                                      |
| Cathepsin D                     | Modified Clontech plasmid  | C-RFP            | Gift from Dr. J. Bonifacino (NIH)                   |

**Table. S2 Antibodies used in this study**

| Antibody    | Source                      | Product Number | Dilution | Applications |
|-------------|-----------------------------|----------------|----------|--------------|
| ARL8a       | Proteintech                 | 17060-1-AP     | 1:1000   | WB           |
| ARL8b       | Proteintech                 | 13049-1-AP     | 1:1000   | WB           |
| Calnexin    | Cell Signaling Technologies | 2679s          | 1:8000   | WB           |
| Cathepsin D | Proteintech                 | 219361         | 1:4000   | WB           |
| CD-MPR      | Developmental               | 22d4           | 1:50     | WB           |

|                      |                             |            |              |       |
|----------------------|-----------------------------|------------|--------------|-------|
|                      | Studies Hybridoma Bank      |            |              |       |
| CI-MPR               | Homemade                    |            | 1:4000/1:500 | WB/IF |
| CI-MPR               | Abcam                       | 124767     | 1:200/1:2000 | IF/WB |
| Diaskedin (C10orf32) | Millipor-Sigma              | HPA037648  | 1:1000       | WB    |
| EEA1                 | BD Biosciences              | 610457     | 1:200        | IF    |
| EEA1                 | Cell Signaling Technologies | 3288       | 1:100        | IF    |
| GAPDH                | Proteintech                 | 6004-1     | 1:5000       | WB    |
| GFP                  | ThermoFisher Scientific     | A10262     | 1:1000       | IF    |
| LAMP1                | Cell Signaling Technologies | 9091s      | 1:500        | IF    |
| LAMP2                | Santa Cruz                  | SC-18822   | 1:500        | IF    |
| LAMTOR4              | Cell Signaling Technologies | 13140S     | 1:200        | IF    |
| Lyspersin (C17orf59) | Agent                       | AP11018c   | 1:500        | WB    |
| mCherry              | ThermoFisher Scientific     | M11217     | 1:1000       | IF    |
| Myrlysin (LOH12CR1)  | Proteintech                 | 17169-1-AP | 1:1000       | WB    |
| NPC1                 | AbCam                       | 134113     | 1:1000       | WB    |
| NPC2                 | Gift from P. Lobel          |            | 1:10000      | WB    |
| PDI                  | Cell Signaling Technologies | 3501S      | 1:10,000     | WB    |
| Rab5                 | Cell Signaling Technologies | 3547       | 1:100        | IF    |
| Rab7a                | Cell Signaling Technologies | 9367       | 1:200        | IF    |
| RFP                  | ThermoFisher Scientific     | R10367     | 1:1000       | IF    |
| Snapin               | SYSY                        | 148 002    | 1:1000       | WB    |
| SREBP2               | Santa Cruz                  | SC-13552   | 1:500        | WB    |
| TGN46                | BioRad                      | AHP500GT   | 1:500        | IF    |
| VPS39                | Santa Cruz                  | SC-514762  | 1:500        | WB    |
| VPS41                | Santa Cruz                  | SC-377118  | 1:500        | WB    |

Fig. S1

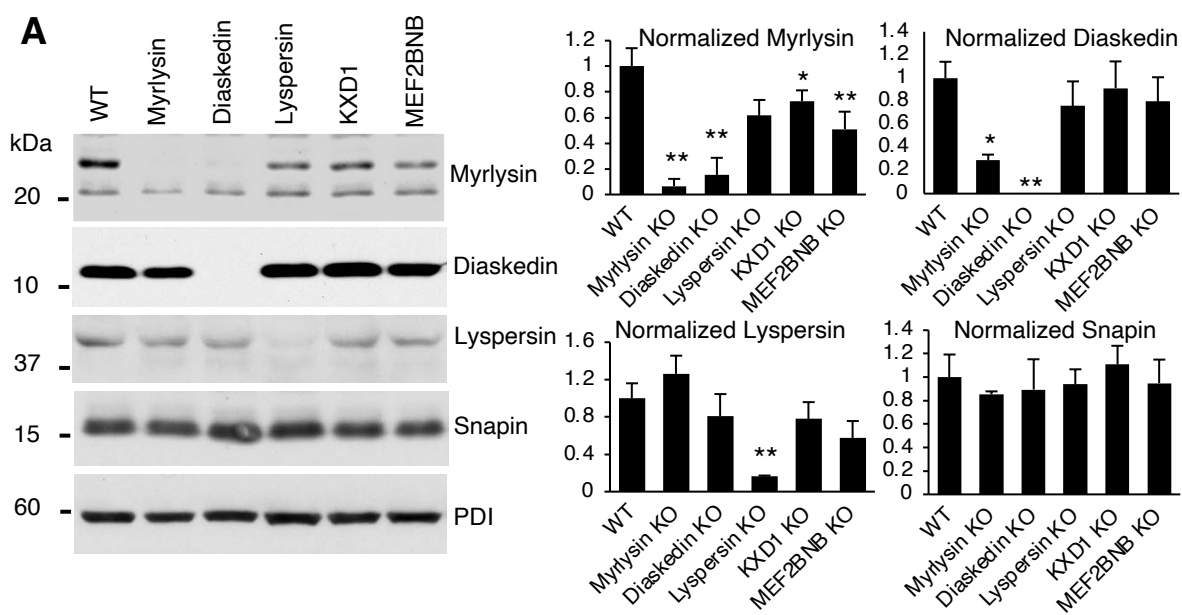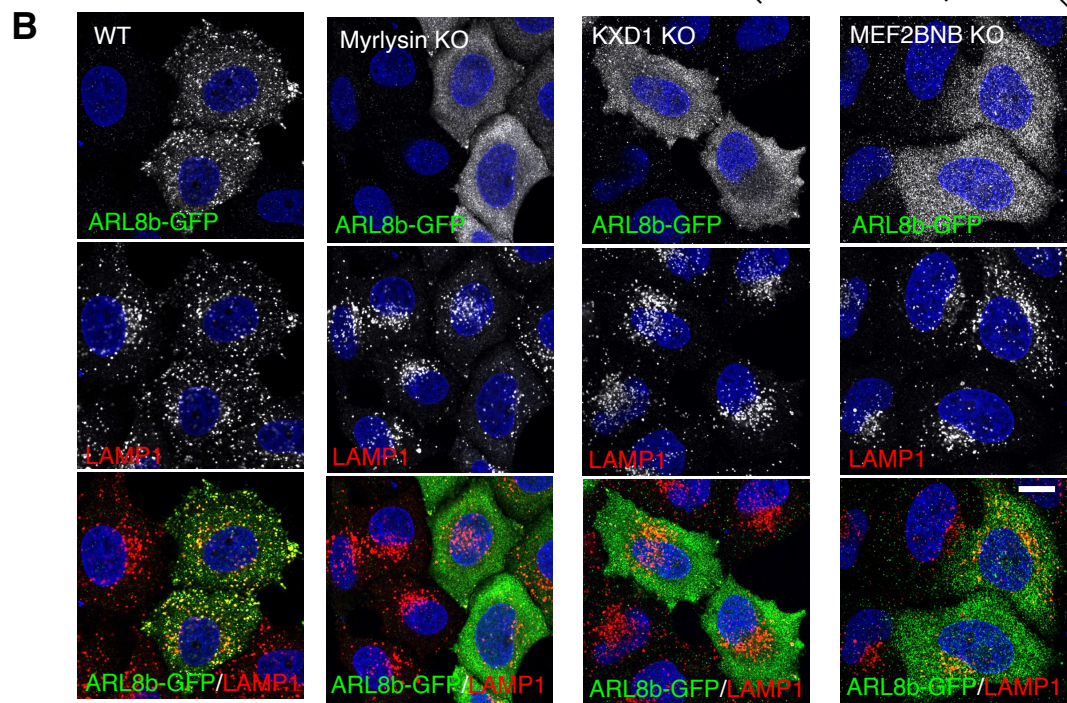

Fig. S2

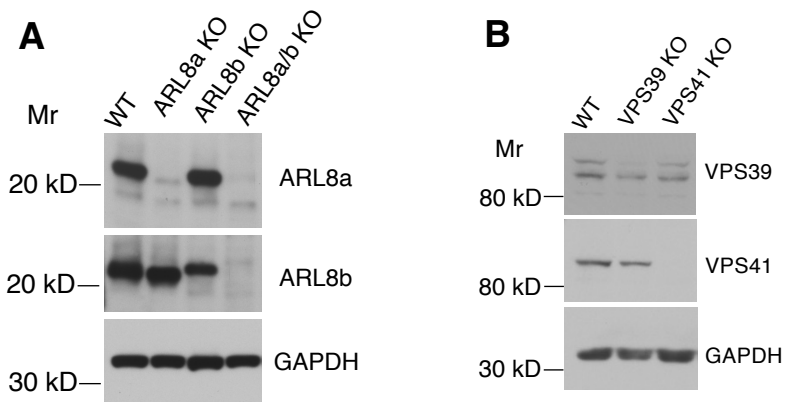

Fig. S3

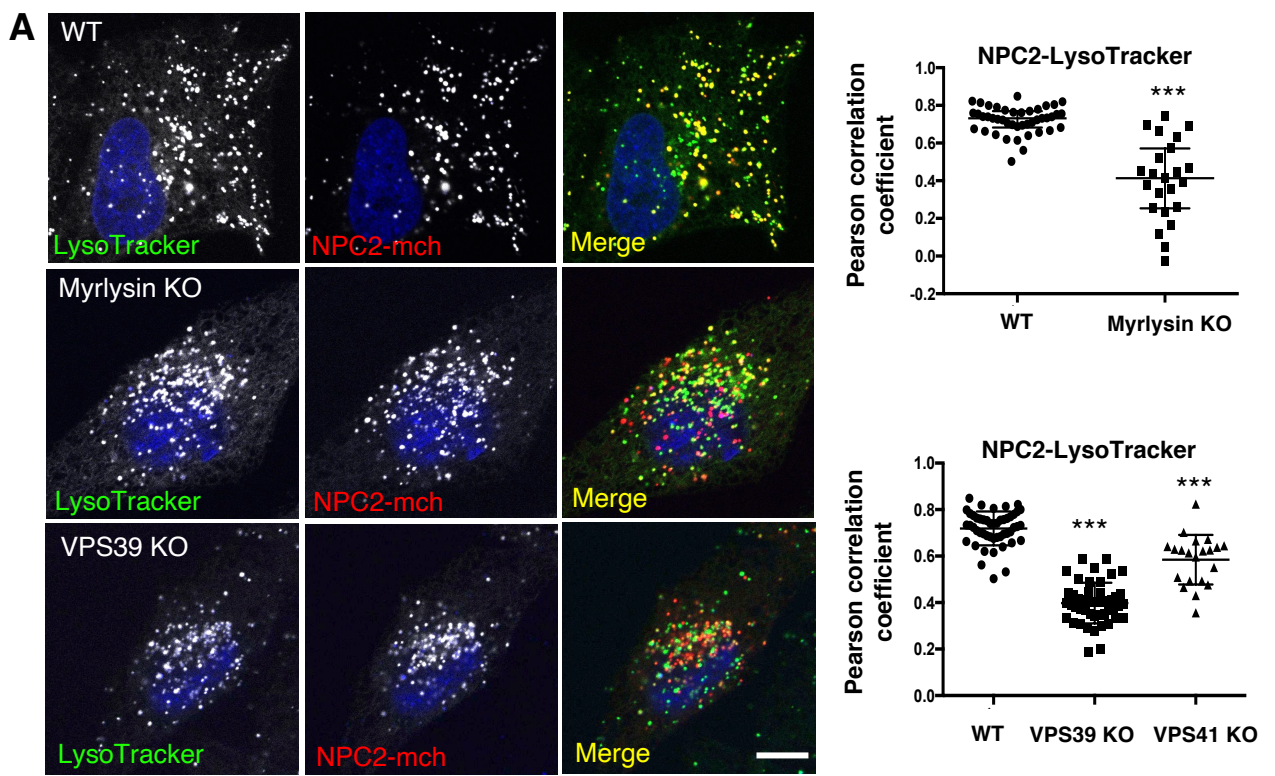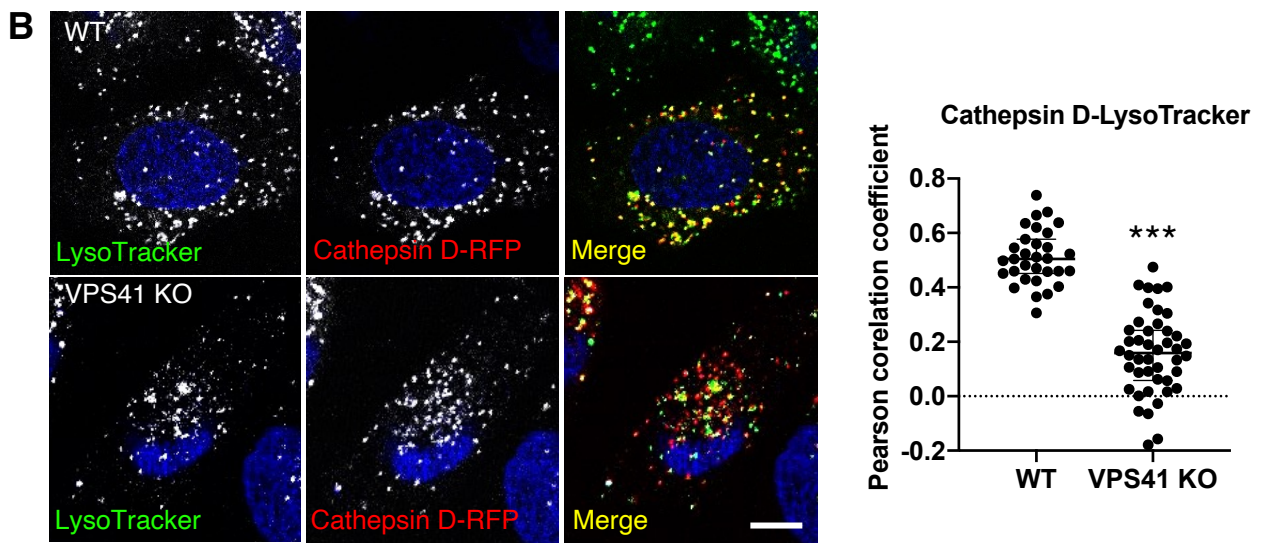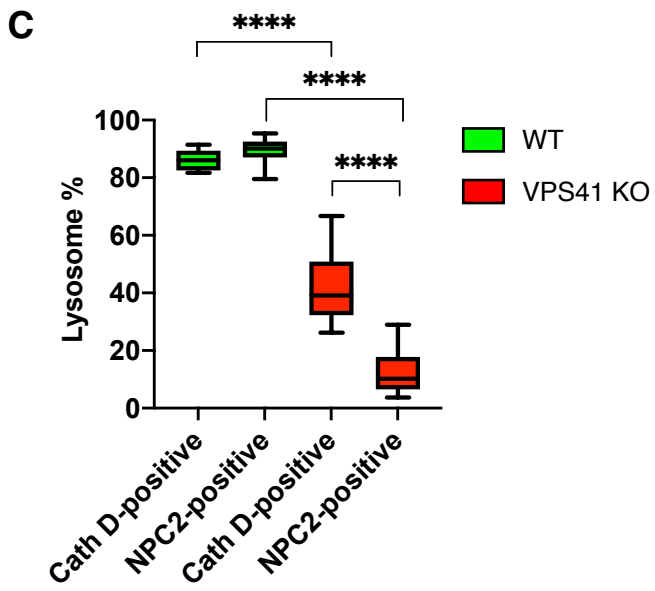

Fig. S4

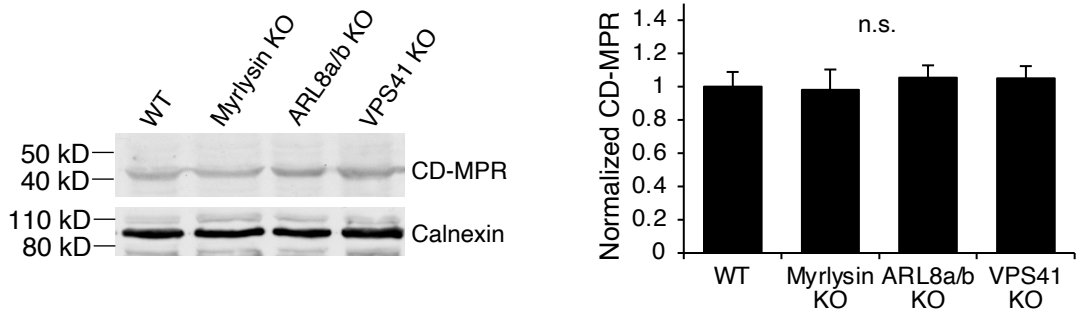

Supplement: mbc-33-ar81-s001.pdf [file mbc-33-ar81-s001.pdf]
